# Supplementary material
Source: publisher figshare collection journal article supplement (https://gsajournals.figshare.com/ndownloader/files/24126776)
Supplement: Supplementary file 1 [file 24126776]

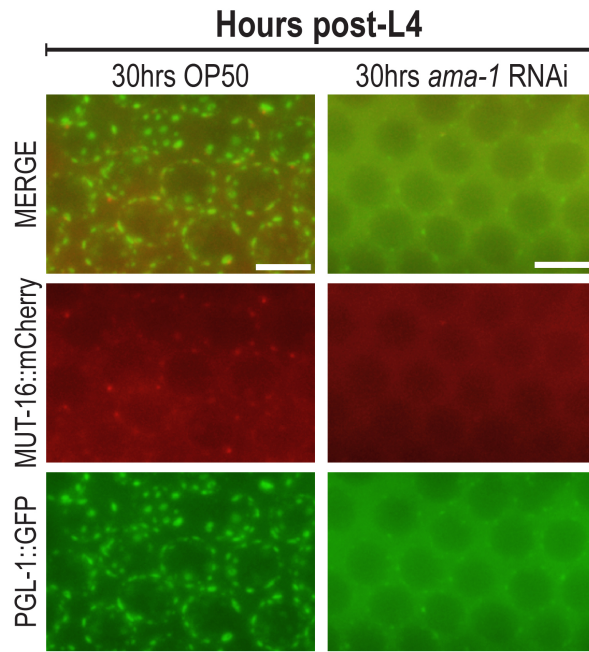

**Figure S2. *Mutator* foci dissipate after *ama-1* RNAi.**

(A) Larval L4 *mut-16::mCherry; pgl-1::gfp* animals were placed on OP50 or on *ama-1* RNAi for 30 hours. MUT-16 foci and PGL-1 granules are present in mid pachytene after 30 hours post-L4 on OP50, but dissipate after 30 hours post-L4 on *ama-1* RNAi. Images are maximum intensity projection of five Z-stacks. Scale bars, 5  $\mu$ m.
